## Transethnic Evaluation Identifies Low-Frequency Loci Associated With 25-Hydroxyvitamin D Concentrations

Jaeyoung Hong,<sup>1\*</sup> Kathryn E. Hatchell,<sup>2\*</sup> Jonathan P. Bradfield,<sup>3</sup> Andrew Bjornes,<sup>4</sup> Alessandra Chesi,<sup>5</sup> Chao-Qiang Lai,<sup>6</sup> Carl D. Langefeld,<sup>7</sup> Lingyi Lu,<sup>7</sup> Yingchang Lu,<sup>8</sup> Pamela L. Lutsey,<sup>9</sup> Solomon K. Musani,<sup>10</sup> Mike A. Nalls,<sup>11,12</sup> Cassianne Robinson-Cohen,<sup>13</sup> Jeffery D. Roizen,<sup>3,14</sup> Richa Saxena,<sup>4</sup> Katherine L. Tucker,<sup>15</sup> Julie T. Ziegler,<sup>7</sup> Dan E. Arking,<sup>16</sup> Joshua C. Bis,<sup>17</sup> Eric Boerwinkle,<sup>18</sup> Erwin P. Bottinger,<sup>8</sup> Donald W. Bowden,<sup>7</sup> Vicente Gilsanz,<sup>19</sup> Denise K. Houston,<sup>20</sup> Heidi J. Kalkwarf,<sup>21</sup> Andrea Kelly,<sup>5,22</sup> Joan M. Lappe,<sup>23</sup> Yongmei Liu,<sup>24</sup> Erin D. Michos,<sup>25</sup> Sharon E. Oberfield,<sup>26</sup> Nicholette D. Palmer,<sup>7</sup> Jerome I. Rotter,<sup>27</sup> Bishwa Sapkota,<sup>28</sup> John A. Shepherd,<sup>29</sup> James G. Wilson,<sup>30</sup> Saonli Basu,<sup>31</sup> Ian H. de Boer,<sup>13</sup> Jasmin Divers,<sup>7</sup> Barry I. Freedman,<sup>7</sup> Struan F. A. Grant,<sup>3,14,32</sup> Hakon Hakanarson,<sup>3,32</sup> Tamara B. Harris,<sup>33</sup> Bryan R. Kestenbaum,<sup>13</sup> Stephen B. Kritchevsky,<sup>20</sup> Ruth J. F. Loos,<sup>8,34</sup> Jill M. Norris,<sup>35</sup> Arnita F. Norwood,<sup>10</sup> Jose M. Ordovas,<sup>36</sup> James S. Pankow,<sup>9</sup> Bruce M. Psaty,<sup>17,37,38</sup> Dharambir K. Sanghera,<sup>28,39,40</sup> Lynne E. Wagenknecht,<sup>7</sup> Babette S. Zemel,<sup>5,22</sup> James Meigs,<sup>41</sup> Josée Dupuis,<sup>1,42</sup> Jose C. Florez,<sup>4,43,45</sup> Thomas Wang,<sup>46</sup> Ching-Ti Liu,<sup>1\*\*</sup> Corinne D. Engelman,<sup>2\*\*</sup> and Liana K. Billings<sup>47,48\*\*</sup>

<sup>1</sup>Department of Biostatistics, Boston University School of Public Health, Boston, Massachusetts 02215; <sup>2</sup>Department of Population Health Sciences, University of Wisconsin–Madison School of Medicine and Public Health, Madison, Wisconsin 53726; <sup>3</sup>Center for Applied Genomics, Division of Human Genetics, The Children’s Hospital of Philadelphia, Philadelphia, Pennsylvania 19104; <sup>4</sup>Center for Genomic Medicine, Massachusetts General Hospital, Boston, Massachusetts 02114; <sup>5</sup>The Children’s Hospital of Philadelphia, Philadelphia, Pennsylvania 19104; <sup>6</sup>USDA-ARS Human Nutrition Research Center on Aging at Tufts University, Boston, Massachusetts 02153; <sup>7</sup>Wake Forest School of Medicine, Winston-Salem, North Carolina 27109; <sup>8</sup>The Charles Bronfman Institute for Personalized Medicine, Icahn School of Medicine at Mount Sinai, New York, New York 10029; <sup>9</sup>Division of Epidemiology and Community Health, University of Minnesota, Minneapolis, Minnesota 55455; <sup>10</sup>Department of Medicine, University of Mississippi Medical Center, Jackson, Mississippi 39216; <sup>11</sup>Data Tecnica International, Glen Echo, Maryland 20812; <sup>12</sup>Laboratory of Neurogenetics, National Institute on Aging, National Institutes of Health, Bethesda, Maryland 20892; <sup>13</sup>Kidney Research Institute, Division of Nephrology, Department of Medicine, University of Washington, Seattle, Washington 98195; <sup>14</sup>Division of Endocrinology, Children’s Hospital of Philadelphia, Philadelphia, Pennsylvania 19104; <sup>15</sup>Department of Biomedical and Nutritional Sciences, University of Massachusetts Lowell, Lowell, Massachusetts 01854; <sup>16</sup>McKusick-Nathans Institute of Genetic Medicine, Johns Hopkins University School of Medicine, Baltimore, Maryland 21205; <sup>17</sup>Cardiovascular Health Research Unit, Department of Medicine, University of Washington, Seattle, Washington 98195; <sup>18</sup>University of Texas

ISSN Print 0021-972X ISSN Online 1945-7197

Printed in USA

Copyright © 2018 Endocrine Society

Received 14 August 2017. Accepted 3 January 2018.

First Published Online 9 January 2018

\*These authors contributed equally to the study.

\*\*These authors jointly supervised the study.

Abbreviations: 25(OH)D, 25-hydroxyvitamin D; AADHS, African American Diabetes Heart Study; ARIC, Atherosclerosis Risk in Communities; ASW, Americans of African Ancestry in SW USA; BMDCS, Bone Mineral Density in Childhood Study; BMI, body mass index; BPRHS, Boston Puerto Rican Health Study; CEU, Northern Europeans From Utah; CHOP, Children’s Hospital of Philadelphia; CHS, Cardiovascular Heart Study; GTEx, Genotype-Tissue Expression; GWAS, genome-wide association study; Health ABC, Health, Aging and Body Composition; IRASFS, Insulin Resistance Atherosclerosis Study Family Study; JHS, Jackson Heart Study; LD, linkage disequilibrium; MESA, Multi-Ethnic Study of Atherosclerosis; METAL, Meta-Analysis Helper software; MXL, Mexican Ancestry From Los Angeles USA; NHANES, National Health and Nutrition Examination Survey; NHLBI National Heart, Lung, and Blood Institute; NIA, National Institute on Aging; NIH, National Institutes of Health; QC, quality control; SNP, single nucleotide polymorphism; SUNLIGHT, Study of Underlying Genetic Determinants of Vitamin D and Highly Related Traits; TRANSCEN-D, Trans-Ethnic Evaluation of Vitamin D; UV, ultraviolet.

Health Science Center at Houston, Houston, Texas 77030; <sup>19</sup>Department of Radiology, Children's Hospital of Los Angeles, Keck School of Medicine, University of Southern California, Los Angeles, California 90027; <sup>20</sup>Department of Internal Medicine, Section on Gerontology and Geriatric Medicine, Wake Forest School of Medicine, Winston-Salem, North Carolina 27109; <sup>21</sup>Division of Gastroenterology, Hepatology and Nutrition, Cincinnati Children's Hospital Medical Center, Cincinnati, Ohio 45229; <sup>22</sup>Perelman School of Medicine at University of Pennsylvania, Philadelphia, Pennsylvania 19104; <sup>23</sup>Creighton University, Omaha, Nebraska 68178; <sup>24</sup>Department of Epidemiology and Prevention, Division of Public Health Sciences, Wake Forest School of Medicine, Winston-Salem, North Carolina 27109; <sup>25</sup>Ciccarone Center for the Prevention of Heart Disease, Johns Hopkins University School of Medicine, Baltimore, Maryland 21205; <sup>26</sup>Division of Pediatric Endocrinology, Diabetes and Metabolism, Columbia University Medical Center, New York, New York 10027; <sup>27</sup>Institute for Translational Genomics and Population Sciences, Department of Pediatrics and Los Angeles Biomedical Research Institute at Harbor-UCLA Medical Center, Torrance, California 90095; <sup>28</sup>Department of Pediatrics, College of Medicine, University of Oklahoma Health Sciences Center, Oklahoma City, Oklahoma 73104; <sup>29</sup>University of California San Francisco School of Medicine, San Francisco, California 94143; <sup>30</sup>Department of Physiology and Biophysics, University of Mississippi Medical Center, Jackson, Mississippi 39216; <sup>31</sup>Division of Biostatistics, University of Minnesota, Minneapolis, Minnesota 55455; <sup>32</sup>Department of Pediatrics, Perelman School of Medicine, University of Pennsylvania, Philadelphia, Pennsylvania 19104; <sup>33</sup>Laboratory of Epidemiology and Population Sciences, National Institute on Aging, Bethesda, Maryland 20892; <sup>34</sup>The Mindich Child Health and Development Institute, Icahn School of Medicine at Mount Sinai, New York, New York 10029; <sup>35</sup>Department of Epidemiology, Colorado School of Public Health, University of Colorado Denver, Aurora, Colorado 80045; <sup>36</sup>Nutrition and Genomics, JM-USDA Human Nutrition Research Center on Aging at Tufts University, Boston, Massachusetts 02155; <sup>37</sup>University of Washington and Department of Epidemiology and Health Sciences, University of Washington, Seattle, Washington 98195; <sup>38</sup>Kaiser Permanente Washington Health Research Institute, Seattle, Washington 98101; <sup>39</sup>Department of Pharmaceutical Sciences, College of Pharmacy, University of Oklahoma Health Sciences Center, Oklahoma City, Oklahoma 73117; <sup>40</sup>Oklahoma Center for Neuroscience, Oklahoma City, Oklahoma 73104; <sup>41</sup>Division of General Internal Medicine, Massachusetts General Hospital, Harvard Medical School, Boston, Massachusetts 02115; <sup>42</sup>National Heart, Lung, and Blood Institute's Framingham Heart Study, Framingham, Massachusetts 01702; <sup>43</sup>Diabetes Unit, Massachusetts General Hospital, Boston, Massachusetts 02114; <sup>44</sup>Programs in Metabolism and Medical & Population Genetics, Broad Institute, Cambridge, Massachusetts 02142; <sup>45</sup>Department of Medicine, Harvard Medical School, Boston, Massachusetts 02115; <sup>46</sup>Vanderbilt University, Nashville, Tennessee 37235; <sup>47</sup>NorthShore University HealthSystem, Evanston, Illinois 60077; and <sup>48</sup>University of Chicago Pritzker School of Medicine, Chicago, Illinois 60637

**Context:** Vitamin D inadequacy is common in the adult population of the United States. Although the genetic determinants underlying vitamin D inadequacy have been studied in people of European ancestry, less is known about populations with Hispanic or African ancestry.

**Objective:** The Trans-Ethnic Evaluation of Vitamin D (TRANSCEN-D) genomewide association study (GWAS) consortium was assembled to replicate genetic associations with 25-hydroxyvitamin D [25(OH)D] concentrations from the Study of Underlying Genetic Determinants of Vitamin D and Highly Related Traits (SUNLIGHT) meta-analyses of European ancestry and to identify genetic variants related to vitamin D concentrations in African and Hispanic ancestries.

**Design:** Ancestry-specific (Hispanic and African) and transethnic (Hispanic, African, and European) meta-analyses were performed with Meta-Analysis Helper software (METAL).

**Patients or Other Participants:** In total, 8541 African American and 3485 Hispanic American (from North America) participants from 12 cohorts and 16,124 European participants from SUNLIGHT were included in the study.

**Main Outcome Measures:** Blood concentrations of 25(OH)D were measured for all participants.

**Results:** Ancestry-specific analyses in African and Hispanic Americans replicated single nucleotide polymorphisms (SNPs) in *GC* (2 and 4 SNPs, respectively). An SNP (rs79666294) near the *KIF4B* gene was identified in the African American cohort. Transethnic evaluation replicated *GC* and *DHCR7* region SNPs. Additionally, the transethnic analyses revealed SNPs rs719700 and rs1410656 near the *ANO6/ARID2* and *HTR2A* genes, respectively.

**Conclusions:** Ancestry-specific and transethnic GWASs of 25(OH)D confirmed findings in *GC* and *DHCR7* for African and Hispanic American samples and revealed findings near *KIF4B*, *ANO6/ARID2*, and *HTR2A*. The biological mechanisms that link these regions with 25(OH)D metabolism warrant further investigation. (*J Clin Endocrinol Metab* 103: 1380–1392, 2018)

Vitamin D inadequacy, defined by 25-hydroxyvitamin D concentrations [25(OH)D]  $\leq 20$  ng/mL, affects approximately half of the adults in the United States, with an even higher prevalence in certain ethnic groups;  $>80\%$  of African American adults and  $>60\%$  of Hispanic adults have inadequate concentrations of 25(OH)D (1–3). Vitamin D inadequacy has been associated with elevated risk of autoimmune diseases, hypertension, dyslipidemia, cardiovascular events, and cardiovascular mortality (1, 4–6). Additionally, recent Mendelian randomization studies have suggested a causal relationship between vitamin D inadequacy and elevated risk of ovarian cancer, hypertension, lower cognitive function, multiple sclerosis, and all-cause and cancer mortality (7–12). Furthermore, some clinical trials have shown that vitamin D and calcium supplementation may reduce the risk of fracture in postmenopausal women (13–15). The high prevalence of vitamin D inadequacy in African and Hispanic Americans and the associated risk for adverse health outcomes could explain a portion of the health disparities between racial and ethnic groups (16). In fact, cross-sectional analyses from National Health and Nutrition Examination Survey (NHANES) data found that 25(OH)D concentrations explain one-quarter of the disparity in systolic blood pressure and more than one-third of the disparity in colorectal cancer mortality and peripheral artery disease between African Americans and people of European ancestry, even after adjustment for a wide range of factors typically related to health disparities (17–19).

Two genomewide association study (GWAS) meta-analyses of 25(OH)D concentrations in populations of European ancestry have been conducted identifying loci including group-specific component (vitamin D binding protein) gene (*GC*), nicotinamide adenine dinucleotide synthetase 1 gene (*NADSYN1*)/7-dehydrocholesterol reductase gene (*DHCR7*), vitamin D 25-hydroxylase gene (*CYP2R1*), and vitamin D 24-hydroxylase gene (*CYP24A1*). *GC* transports the vitamin D metabolites in the blood. *DHCR7* catalyzes the conversion of 7-dehydrocholesterol in the skin to previtamin D<sub>3</sub>, a precursor to vitamin D<sub>3</sub>. *CYP2R1* codes for a cytochrome P450 enzyme that hydroxylates vitamin D<sub>2</sub>/D<sub>3</sub> to 25(OH)D. *CYP24A1* codes for another cytochrome P450 enzyme that degrades 25(OH)D to an inactive metabolite, 24,25-dihydroxyvitamin D. However, no large-scale GWAS has been performed in African or Hispanic populations (1, 20). One study reported that the heritability of 25(OH)D concentrations in African Americans was 28%, and in two Hispanic cohorts it ranged from 23% to 41% (21). A small GWAS in 229 Hispanic Americans found five independent single

nucleotide polymorphisms (SNPs) (three from nongenic regions, one in *A2BP1*, and one in *GPR114*) that were associated with 25(OH)D concentrations, with replication in the full set of 1,190 Hispanic Americans (22). To provide additional evidence in African American and Hispanic populations, we assembled the Trans-Ethnic Evaluation of Vitamin D (TRANSCEN-D) GWAS consortium, including 12,026 subjects from 12 cohorts of African ( $n = 8541$ ) and Hispanic ( $n = 3485$ ) ancestry. Through a genomewide meta-analysis of multiethnic cohorts, we sought to confirm genetic associations found in the European ancestry population and identify genetic variants related to 25(OH)D concentrations in African and Hispanic populations.

## Materials and Methods

TRANSCEN-D consisted of 12 cohorts: 9 African American ( $n = 8541$ ) and 3 Hispanic from North America ( $n = 3485$ ; Table 1). Briefly, the African American cohorts included the African American Diabetes Heart Study (AADHS;  $n = 531$ ), the Atherosclerosis Risk in Communities (ARIC) study ( $n = 2658$ ), the Bone Mineral Density in Childhood Study (BMDCS;  $n = 161$ ), the Children's Hospital of Philadelphia (CHOP) cohort ( $n = 379$ ), the Cardiovascular Heart Study (CHS;  $n = 303$ ), the Health, Aging and Body Composition (Health ABC) study ( $n = 981$ ), Mount Sinai BioMe BioBank ( $n = 361$ ), the Jackson Heart Study (JHS;  $n = 2132$ ), and the Multi-Ethnic Study of Atherosclerosis (MESA;  $n = 1035$ ). The Hispanic American cohorts included the Boston Puerto Rican Health Study (BPRHS;  $n = 1360$ ), Insulin Resistance Atherosclerosis Study Family Study (IRASFS;  $n = 738$ ), and MESA ( $n = 1387$ ). Additionally, as part of the transethnic meta-analysis, data from 16,124 participants in the Study of Underlying Genetic Determinants of Vitamin D and Highly Related Traits [SUNLIGHT, the largest European ancestry GWAS for 25(OH)D] were used. The data used in these analyses were collected under guidelines from the relevant institutional review boards, and all participants provided informed consent, including consent for use of genetic data. The TRANSCEN-D cohort characteristics are included in Table 1.

Each TRANSCEN-D cohort followed the sample and SNP quality control (QC) procedures specified in the TRANSCEN-D uniform analysis plan. Sample QC excluded samples with  $<95\%$  call rates. Additional sample exclusion criteria applied by some cohorts are reported in Supplemental Table 1. SNP-level exclusion criteria (at the cohort level) included minor allele frequency (MAF)  $<0.01$  (IRASFS cohort used MAF  $<0.05$ ), call rate  $<95\%$ , and Hardy-Weinberg equilibrium  $P < 10^{-6}$ . Imputation was done with IMPUTE or the Markov Chain-based haplotyper (MaCH). IMPUTE users excluded SNPs with a proper info  $<0.4$ , and MaCH users excluded SNPs with an  $r^2 <0.3$ . Each cohort performed imputation with the phase 1 reference panels of the 1000 Genomes Project (23). 25(OH)D values were natural log transformed because vitamin D values tend to be nonnormally distributed. SNPs that passed QC were tested for association with 25(OH)D concentrations via an additive genetic model adjusted for age,

**Table 1. TRANSCEN-D Cohorts' Specific Characteristics**

| Ethnicity           | Cohort                                 | n                  | Female | Age, y [Mean (SD)] | BMI, kg/m <sup>2</sup> [Mean (SD)] | 25(OH)D, ng/mL [Mean (SD)] |
|---------------------|----------------------------------------|--------------------|--------|--------------------|------------------------------------|----------------------------|
| African American    | AADHS <sup>a,b</sup>                   | 531                | 56.8%  | 56.5 (9.6)         | 35.1 (8.5)                         | 20.5 (11.8)                |
|                     | ARIC <sup>a</sup>                      | 2658               | 56.0%  | 56.3 (5.8)         | 30.0 (6.2)                         | 19.0 (7.0)                 |
|                     | BMDCS <sup>b</sup>                     | 161                | 53.4%  | 17.2 (4.2)         | 23.6 (5.1)                         | 16.3 (7.8)                 |
|                     | CHOP <sup>a</sup>                      | 379                | 55.1%  | 11.7 (4.7)         | 24.6 (9.1)                         | 22.6 (13.1)                |
|                     | CHS <sup>a</sup>                       | 303                | 70.0%  | 72.7 (5.5)         | 28.4 (5.5)                         | 18.1 (8.7)                 |
|                     | Health ABC <sup>b</sup>                | 981                | 57.2%  | 74.5 (2.9)         | 28.4 (5.5)                         | 20.8 (9.0)                 |
|                     | Mount Sinai BioMe BioBank <sup>b</sup> | 361                | 73.4%  | 55.6 (14.7)        | 30.4 (8.4)                         | 22.9 (13.5)                |
|                     | JHS <sup>a</sup>                       | 2132               | 60.7%  | 49.9 (12.1)        | 32.3 (7.8)                         | 14.9 (6.5)                 |
|                     | MESA <sup>a</sup>                      | 1035               | 55.0%  | 62.3 (10.1)        | 30.1 (5.8)                         | 19.1 (9.2)                 |
|                     | Hispanic                               | BPRHS <sup>b</sup> | 1360   | 70.1%              | 57.1 (7.5)                         | 31.8 (6.6)                 |
| IRASFS <sup>b</sup> |                                        | 738                | 58.9%  | 40.6 (13.7)        | 28.3 (5.7)                         | 16.5 (7.2)                 |
| MESA <sup>a</sup>   |                                        | 1387               | 52.4%  | 61.4 (10.3)        | 29.5 (5.2)                         | 24.7 (11.2)                |

Abbreviation: SD, standard deviation.

<sup>a</sup>Chromatographic 25(OH)D assay was used.

<sup>b</sup>Immune-based 25(OH)D assay was used.

sex, body mass index (BMI), ultraviolet (UV) index, and principal components 1 to 10, obtained from genotype data. Principle components were adjusted to account for population structure. Two cohorts, AADHS and IRASFS, were family studies and accounted for sample relatedness [AADHS: linear mixed model (Genome-wide Efficient Mixed Model Association, or GEMMA); IRASFS: variance component models (Sequential Oligogenic Linkage Analysis Routines, or SOLAR)] and admixture proportions instead of principal components. Site-specific UV index in the month of the blood draw was calculated for 58 US cities by averaging of the previous 3 months' UV indexes, based on data from the National Weather Service Climate Prediction Center (24). Cohorts used continuous UV index values for the city nearest the blood draw location.

The cohort-specific genomewide association results were meta-analyzed within each ancestral group with the sample size-weighted  $z$  score approach in Meta-Analysis Helper software (METAL) (25). The  $z$  score approach was used to adjust for the heterogeneity of assays used by the individual cohorts (1). The results from each cohort were corrected with the genomic control inflation factor,  $\lambda_{GC}$ , before meta-analysis. The ancestry-specific (African and Hispanic ancestry) meta-analysis results were then combined with previously published SUNLIGHT meta-analysis results via a sample size-weighted  $z$  score method of log-transformed 25(OH)D values, resulting in transethnic meta-analysis results (1). The sample size-weighted  $z$  score method was chosen over the inverse variance-weighted fixed-effects model because of the differences in linkage disequilibrium (LD) patterns between the common variants (MAF > 0.01) in the diverse ancestries and differences in 25(OH)D assays between the cohorts. The significance threshold was set to  $P < 5 \times 10^{-8}$ .

We used R version 3.1.1 software to draw regional association plots showing  $-\log_{10} P$  values in the  $y$ -axis for all SNPs in the region (within 250 kb of the index SNPs). The index SNP for the regional association plots was the SNP with the lowest  $P$ -value from the transethnic meta-analysis.

We calculated statistical power to identify SNPs at the significance threshold of  $5 \times 10^{-8}$  for a two-sided test, assuming an additive genetic model in Quanto version 1.2.4.

With our transethnic sample size of 28,150, we have 80% power ( $\alpha = 5 \times 10^{-8}$ ) to detect an effect size of 0.012 (units in  $\log[25(OH)D]$ ), assuming an average 25(OH)D level of 19 nmol/L (SE 0.136) and minor allele frequency of 0.1.

## Results

Our transethnic and ancestry-specific meta-analyses replicated findings from previous vitamin GWAS studies, as summarized in Supplemental Table 3, and discovered potentially novel findings near three genes: *KIF4B*, *HTR2A*, and *ANO6/ARID2*.

Genetic variants in *GC* were associated with 25(OH)D concentrations in both the African and Hispanic ancestry analyses at levels of genomewide significance (Table 2). *GC* SNPs rs843005 ( $P = 1.0 \times 10^{-12}$ ,  $n = 7255$ ) and rs222040 ( $P = 1.1 \times 10^{-12}$ ,  $n = 7258$ ) were associated with 25(OH)D in the African ancestry cohort. These SNPs were in low LD with the top SUNLIGHT *GC* SNP, rs2282679 (LD as measured by coefficient of correlation  $r^2 = 0.08$  for both rs843005 and rs222040, in 1000 Genomes Americans of African Ancestry in SW USA (ASW) (1). For the Hispanic ancestry cohort, four *GC* SNPs reached genomewide significance: rs1526692 ( $P = 2.6 \times 10^{-10}$ ,  $n = 2095$ ), rs377687 ( $P = 6.2 \times 10^{-9}$ ,  $n = 2095$ ), rs56003670 ( $P = 6.7 \times 10^{-9}$ ,  $n = 2099$ ), and rs3755967 ( $P = 9.0 \times 10^{-9}$ ,  $n = 2725$ ). These SNPs were not highly correlated with each other, and the LD between these four SNPs and the top SUNLIGHT *GC* SNP ranged from 0.11 to 0.93 in 1000 Genomes Mexican Ancestry From Los Angeles USA (MXL) and 0.097 to 1.0 in 1000 Genomes Puerto Ricans From Puerto Rico.

An SNP, rs79666294, near kinesin family member 4B gene (*KIF4B*) reached genomewide significance ( $P = 2.7 \times 10^{-8}$ ,  $n = 3999$ ) in the African ancestry cohort. This SNP was not genotyped, nor imputed, in

**Table 2. Genomewide Significant Vitamin D SNPs in African and Hispanic Ancestry Populations**

| SNP                                  | Chromosome | Position  | Reference | Alternate | Reference Allele Frequency | z-Score | P                     | Sample Size | Nearest Locus |
|--------------------------------------|------------|-----------|-----------|-----------|----------------------------|---------|-----------------------|-------------|---------------|
| African ancestry GWAS meta-analysis  |            |           |           |           |                            |         |                       |             |               |
| rs843005                             | 4          | 72616327  | T         | C         | 0.42                       | 7.1     | $1.0 \times 10^{-12}$ | 7255        | GC            |
| rs222040                             | 4          | 72616932  | A         | G         | 0.42                       | 7.1     | $1.1 \times 10^{-12}$ | 7258        | GC            |
| rs79666294                           | 5          | 154426706 | C         | T         | 0.99                       | 5.6     | $2.7 \times 10^{-8}$  | 3999        | KIF4B         |
| Hispanic ancestry GWAS meta-analysis |            |           |           |           |                            |         |                       |             |               |
| rs1526692                            | 4          | 72578724  | A         | G         | 0.69                       | 6.3     | $2.6 \times 10^{-10}$ | 2095        | GC            |
| rs377687                             | 4          | 72569065  | A         | G         | 0.38                       | 5.8     | $6.2 \times 10^{-9}$  | 2095        | GC            |
| rs56003670                           | 4          | 72572154  | A         | C         | 0.75                       | 5.8     | $6.7 \times 10^{-9}$  | 2099        | GC            |
| rs3755967                            | 4          | 72609398  | C         | T         | 0.77                       | 5.7     | $9.0 \times 10^{-9}$  | 2725        | GC            |

Genomewide significance is defined as  $P < 5 \times 10^{-8}$ . The reference allele is the vitamin D raising allele. Position corresponds to build 37. The model was adjusted for age, sex, BMI, UV index, and principal components.

the SUNLIGHT consortium. The SNPs in this region were not associated with 25(OH)D concentrations in SUNLIGHT or the Hispanic ancestry meta-analysis (Supplemental Fig. 1).

The transthetic meta-analysis in METAL identified variants in or near *GC*, *DHCR7*, *HTR2A*, and *ANO6/ARID2* as significantly associated with 25(OH)D. Overall, 100 SNPs reached genomewide significance in the transthetic meta-analysis (Supplemental Table 2); however, many of these were correlated with each other. After we considered LD within each ancestry [ASW, MXL, and Northern Europeans From Utah (CEU)], using 1000 Genomes Project data to remove SNPs with ancestry-specific  $r^2 > 0.05$  (26), 13 SNPs remained (Table 3). Nine of these SNPs were on chromosome 4 in or upstream of *GC*; two were upstream of *DHCR7*, one was located between *ANO6* and *ARID2*, and one was located near the *HTR2A* gene region.

Regional association plots highlight genomic intervals of interest near loci *GC*, *DHCR7*, *HTR2A*, and *ANO6/ARID2* (Figs. 1, 2, and 3 and Supplemental Fig. 2). The black diamond in each figure represents the most strongly associated SNP in that region from the transthetic meta-analysis results in Table 3. The regional association plot for the *GC* locus (Fig. 1) demonstrates strong associations but different top SNPs in this locus for each ancestry. For instance, the top SNP in this region in the European ancestry was rs2282679 ( $P = 4.6 \times 10^{-63}$ , MAF = 0.29), whereas the top SNPs in the African and Hispanic ancestries were rs843005 ( $P = 1.0 \times 10^{-12}$ , MAF = 0.42) and rs1526692 ( $P = 2.6 \times 10^{-10}$ , MAF = 0.31), respectively. The top African and Hispanic SNPs were in low LD with rs2282679 ( $r^2 = 0.08$  and  $0.17$ , respectively). The top SNP differs by ancestry, probably because of differences in the LD structure and variation in frequency of the underlying functional SNPs between ancestries.

At the *DHCR7* locus (Fig. 2), the top SNPs for the European (rs7944926;  $P = 1.6 \times 10^{-13}$ , MAF = 0.23) and

African (rs12792306;  $P = 4.8 \times 10^{-6}$ , MAF = 0.41) ancestries were in strong LD ( $r^2 > 0.8$ ) with the top SNP from the transthetic analysis (rs7938885;  $P = 4.5 \times 10^{-16}$ , MAF = 0.37). For the Hispanic ancestry, only one cohort (IRAFS) had this SNP, and the sample size dropped down to 738; therefore, power was probably insufficient to detect an association with this locus.

The locus *HTR2A* (rs1410656) was identified by the transthetic GWAS (Fig. 3). In the European ancestry-specific meta-analysis, SNP rs1410656 is a low-frequency variant (MAF = 0.01) associated with 25(OH)D concentrations ( $P = 1.2 \times 10^{-7}$ ) and the only strongly associated SNP in this region; no other SNPs with  $r^2 > 0.3$  with rs1410656 are in this region. The plot for African ancestry shows a weaker association with this SNP ( $P = 1.2 \times 10^{-3}$ , MAF = 0.10) but a stronger association with two other SNPs near the *HTR2A* gene that are not in LD ( $r^2 < 0.3$ ) with the top transthetic SNP. The top transthetic SNP was not available in the Hispanic ancestry cohorts, nor were there highly significant SNPs in this region.

Another locus, *ANO6/ARID2* (rs719700), was identified by the transthetic GWAS (Supplemental Fig. 2). In the European ancestry-specific meta-analysis, SNP rs719700 is a low-frequency variant (MAF = 0.01) associated with 25(OH)D concentrations ( $P = 1.7 \times 10^{-7}$ ) and the only strongly associated SNP in this region; no other SNPs with  $r^2 > 0.3$  with rs719700 are in this region. The plot for African ancestry shows a weaker association with this SNP ( $P = 5.0 \times 10^{-3}$ , MAF = 0.06) but a stronger association with several other SNPs in or upstream of the *ARID2* gene that are not in LD ( $r^2 < 0.3$ ) with the top transthetic SNP. The top transthetic SNP was not available in the Hispanic ancestry cohorts, nor were there highly significant SNPs in this region.

Regional association plots for *KIF4B*, *CYP2R1*, and *CYP24A1* are included in Supplemental Figs. 1, 3, and 4. Quantile-quantile and Manhattan plots for ancestry-specific

**Table 3. Genomewide Significant Vitamin D SNPs in a Transethnic Evaluation and Stratified by Ethnicity**

| SNP INFO   |            |          |           |           |                    | Transethnic Z-Score METAL  |         |                       |             |
|------------|------------|----------|-----------|-----------|--------------------|----------------------------|---------|-----------------------|-------------|
| SNP        | Chromosome | Position | Reference | Alternate | Nearest Locus      | Reference Allele Frequency | z-Score | P                     | Sample Size |
| rs2282679  | 4          | 72608383 | T         | G         | GC                 | 0.77                       | 16.6    | $4.4 \times 10^{-63}$ | 24,497      |
| rs7041     | 4          | 72618334 | C         | A         | GC                 | 0.44                       | 14.8    | $1.6 \times 10^{-49}$ | 24,729      |
| rs377687   | 4          | 72569065 | A         | G         | GC                 | 0.35                       | 8.4     | $4.9 \times 10^{-17}$ | 23,402      |
| rs6837549  | 4          | 72596821 | T         | G         | GC                 | 0.46                       | 7.4     | $1.7 \times 10^{-13}$ | 21,193      |
| rs1402155  | 4          | 72705908 | G         | A         | GC                 | 0.63                       | 7.6     | $2.1 \times 10^{-14}$ | 24,431      |
| rs17767445 | 4          | 72745267 | A         | G         | GC                 | 0.15                       | 7.2     | $6.1 \times 10^{-13}$ | 20,417      |
| rs13107347 | 4          | 72974748 | C         | T         | GC <sup>a</sup>    | 0.33                       | 6.1     | $8.0 \times 10^{-10}$ | 26,517      |
| rs1352844  | 4          | 72647749 | T         | C         | GC                 | 0.13                       | 5.7     | $1.5 \times 10^{-8}$  | 24,119      |
| rs6814839  | 4          | 72751722 | A         | G         | GC                 | 0.88                       | 5.6     | $2.0 \times 10^{-8}$  | 26,505      |
| rs7938885  | 11         | 71170043 | C         | T         | DHCR7 <sup>b</sup> | 0.63                       | 8.1     | $4.5 \times 10^{-16}$ | 22,039      |
| rs10898223 | 11         | 71219264 | G         | A         | DHCR7 <sup>c</sup> | 0.84                       | 5.6     | $1.9 \times 10^{-8}$  | 22,020      |
| rs719700   | 12         | 46029209 | T         | C         | ANO6/ARID2         | 0.96                       | 5.6     | $2.8 \times 10^{-8}$  | 12,087      |
| rs1410656  | 13         | 47542521 | C         | T         | HTR2A              | 0.94                       | 5.9     | $3.7 \times 10^{-9}$  | 12,841      |

(Continued)

and transethnic analyses can be found in Supplemental Figs. 5–10.

## Discussion

In this study, we have examined ancestry-specific GWAS meta-analyses and a transethnic meta-analysis to evaluate the genetic determinants of 25(OH)D concentrations in people of African and Hispanic ancestries. In addition to confirming findings from previous studies, we have identified variants rs719700, near *ANO6/ARID2*, and rs1410656, near *HTR2A*, by transethnic analysis and a variant, rs79666294, near *KIF4B* by ancestry-specific GWAS meta-analyses in the African American cohorts (1, 20). Thus far little has been published on the genetic architecture underlying 25(OH)D concentrations in people of non-European ancestry. Therefore, this study makes an important contribution to our knowledge.

Variants in *GC*, *DHCR7*, *CYP2R1*, and *CYP24A1*, in order of significance, were the loci with the strongest associations with 25(OH)D concentrations in SUNLIGHT, a GWAS of 33,996 individuals of European ancestry (1). Our transethnic meta-analysis replicated the *GC* and *DHCR7* findings: several SNPs in or upstream of *GC* reached genomewide significance, and two additional genomewide significant SNPs were located upstream of *DHCR7* (rs7938885 and rs10898223), in a similar location to the top *DHCR7* SNP from SUNLIGHT (3 kb and 60 kb away, respectively). Additionally, ancestry-specific meta-analyses in African and Hispanic Americans replicated the *GC* findings, underscoring that the *GC* locus is associated with vitamin D concentrations for all three ancestries. Of note, the top African and Hispanic ancestry SNPs are in low LD with the top European SNP ( $r^2 = 0.08$  and  $r^2 = 0.17$ ,

respectively). Although the tagging (genotyped) SNP associated with vitamin D concentrations varies by ancestry [because of differing LD (correlation) structures in different ancestries], the consistency of results indicates that *GC* is biologically relevant to vitamin D concentrations. Previously reported SNPs, rs4588 and rs7041, that are nonsynonymous variants were significantly associated with vitamin D levels in the transethnic evaluation [rs4588 ( $P = 2.3 \times 10^{-11}$ ) and rs7041 ( $P = 1.6 \times 10^{-49}$ )] but not in the ancestry-specific evaluations [Hispanic: rs4588 ( $P = 1.2 \times 10^{-6}$ ), rs7041 ( $P = 1.6 \times 10^{-5}$ ), African (rs4588 ( $P = 1.7 \times 10^{-7}$ ), and rs7041 ( $P = 1.1 \times 10^{-7}$ )). Ancestry-specific meta-analyses replicated the *DHCR7* locus in African Americans with only suggestive evidence for replication in Hispanic Americans, probably because of a reduced sample size in our Hispanic ancestry sample. The top African ancestry SNP is in high LD ( $>0.5$ ) with the top European SNP. Additionally, our Hispanic ancestry meta-analysis showed a consistent direction of effect for the five genomewide significant SNPs (rs10141935, rs1507023, rs4778359, rs9937918, and rs2806508) in a previously conducted Hispanic ancestry GWAS, although our Hispanic ancestry sample included 192 of the Hispanic Americans from the previous GWAS (22). None of the previously reported genomewide significant SNPs were found in the MESA cohort, and only two (rs9937918 and rs2806508) were in the BPRHS cohort. However, the direction of effect in the BPRHS cohort alone was consistent with the previous GWAS, providing some evidence for replication of two of the previously discovered SNPs.

Interestingly, neither ancestry-specific GWAS replicated previous associations with loci in *CYP2R1* and *CYP24A1* from the SUNLIGHT consortium. The top SUNLIGHT SNP in *CYP2R1* was rs10741657 ( $P = 3.3 \times 10^{-20}$ , discovery plus replication samples, MAF = 0.40).

**Table 3. Continued**

| AFA Z-Score METAL          |         |                      |             | HIS Z-Score METAL          |         |                      |             | SUNLIGHT Z-Score METAL     |         |                       |             |
|----------------------------|---------|----------------------|-------------|----------------------------|---------|----------------------|-------------|----------------------------|---------|-----------------------|-------------|
| Reference Allele Frequency | z-Score | P                    | Sample Size | Reference Allele Frequency | z-Score | P                    | Sample Size | Reference Allele Frequency | z-Score | P                     | Sample Size |
| 0.91                       | 3.6     | $2.7 \times 10^{-4}$ | 7097        | 0.80                       | 4.9     | $1.0 \times 10^{-6}$ | 1361        | 0.71                       | 16.8    | $4.6 \times 10^{-63}$ | 16,039      |
| 0.17                       | 5.3     | $1.1 \times 10^{-7}$ | 7258        | 0.44                       | 4.2     | $2.6 \times 10^{-5}$ | 1361        | 0.56                       | 13.6    | $3.7 \times 10^{-42}$ | 16,110      |
| 0.34                       | 2.5     | $1.3 \times 10^{-2}$ | 7258        | 0.38                       | 5.8     | $6.2 \times 10^{-9}$ | 2095        | 0.34                       | 6.8     | $8.0 \times 10^{-12}$ | 14,049      |
| 0.38                       | 0.2     | $8.6 \times 10^{-1}$ | 5126        | NA                         | NA      | NA                   | NA          | 0.49                       | 8.4     | $5.1 \times 10^{-17}$ | 16,067      |
| 0.46                       | 1.5     | $1.3 \times 10^{-1}$ | 8290        | 0.67                       | 4.7     | $3.1 \times 10^{-6}$ | 2100        | 0.72                       | 7.2     | $8.6 \times 10^{-13}$ | 14,041      |
| 0.07                       | 2.1     | $3.4 \times 10^{-2}$ | 7258        | 0.26                       | 3.1     | $1.9 \times 10^{-3}$ | 2099        | 0.19                       | 6.7     | $1.6 \times 10^{-11}$ | 11,060      |
| 0.23                       | 2.7     | $6.4 \times 10^{-3}$ | 8293        | 0.35                       | 1.4     | $1.8 \times 10^{-1}$ | 2102        | 0.37                       | 5.5     | $4.6 \times 10^{-8}$  | 16,122      |
| 0.13                       | 1.1     | $2.5 \times 10^{-1}$ | 7258        | 0.07                       | 2.4     | $1.8 \times 10^{-2}$ | 738         | 0.13                       | 5.7     | $1.4 \times 10^{-8}$  | 16,123      |
| 0.77                       | 1.4     | $1.7 \times 10^{-1}$ | 8293        | 0.93                       | 1.1     | $2.9 \times 10^{-1}$ | 2101        | 0.94                       | 5.8     | $5.2 \times 10^{-9}$  | 16,111      |
| 0.39                       | 4.2     | $2.7 \times 10^{-5}$ | 7258        | 0.51                       | 0.8     | $4.4 \times 10^{-1}$ | 738         | 0.77                       | 7.0     | $2.1 \times 10^{-12}$ | 14,043      |
| 0.80                       | 1.7     | $8.4 \times 10^{-2}$ | 7251        | 0.83                       | 1.6     | $1.2 \times 10^{-1}$ | 738         | 0.86                       | 5.5     | $4.5 \times 10^{-8}$  | 14,031      |
| 0.94                       | 2.8     | $5.0 \times 10^{-3}$ | 6727        | NA                         | NA      | NA                   | NA          | 0.99                       | 5.2     | $1.7 \times 10^{-7}$  | 5360        |
| 0.90                       | 3.2     | $1.2 \times 10^{-3}$ | 7251        | NA                         | NA      | NA                   | NA          | 0.99                       | 5.3     | $1.2 \times 10^{-7}$  | 5590        |

Genomewide significance is defined as  $P < 5 \times 10^{-8}$ . Position corresponds to build 37. Shading indicates that for the given race or ethnicity the SNP is in LD ( $r^2 > 0.05$ ) with another SNP for that race; LD between the 106 SNPs was calculated for each ancestry (1000 Genomes data for MXL, ASW, and CEU populations were used) with the LD Link Tool (SNP Clip), provided by the National Cancer Institute.

Abbreviations: AFA, African ancestry; HIS, Hispanic ancestry; NA, not available (not genotyped or imputed).

<sup>a</sup>304 kb upstream of GC in *NPPFR2*.

<sup>b</sup>11 kb upstream of *DHCR7* in *NADSYN1*.

<sup>c</sup>60 kb upstream of *DHCR7*.

This SNP was not significantly associated with 25(OH)D in the Hispanic ( $P = 0.17$ , MAF = 0.34) or African ( $P = 0.89$ , MAF = 0.27) ancestry-specific analyses. *CYP2R1* is responsible for conversion of vitamin D<sub>2</sub>/D<sub>3</sub> to 25(OH)D; this conversion happens in the liver and should not differ by degree of skin pigmentation that can differ by ancestry. Therefore, a lack of association in non-European ancestry is unexpected. Power analyses for our transeethnic sample ( $n = 24,443$  for *CYP2R1*) indicate that we have statistical power ranging from 6.8% to 86.0% to detect an effect size in *CYP2R1* that is roughly equivalent to 0.06% to 0.17% of the trait variation explained by an SNP ( $R^2$ ) with MAF 0.3575. This finding could explain why we did not observe replication of the *CYP2R1* results reported in SUNLIGHT. It is also likely that the SNP found in SUNLIGHT is in strong LD with the underlying functional variant in European ancestry but not in Hispanic or African ancestries, in which case the underlying functional variant was not adequately tagged by any genotyped or imputed SNP. The top SUNLIGHT SNP in *CYP24A1*, rs6013897 ( $P = 6.0 \times 10^{-10}$ , discovery plus replication samples, MAF = 0.21), was not replicated in the Hispanic and African ancestry-specific analyses ( $P = 0.02$ , MAF = 0.35 and  $P = 0.30$ , MAF = 0.24, respectively). *CYP24A1* encodes an enzyme that degrades 25(OH)D to 24,25-dihydroxyvitamin D, an inactive metabolite. Lack of replication is not unexpected for *CYP24A1* because the variant in this gene was found only in the combined discovery and replication sample ( $n = 33,996$ ) in SUNLIGHT but not in a smaller GWAS

meta-analysis by Ahn *et al.* (20) ( $n = 4501$ ) or in the SUNLIGHT discovery sample ( $n = 16,124$ ) (1). Calculated statistical power for *CYP24A1* is 0.01% for those of Hispanic ancestry ( $n = 738$ ) and 0.41% for those of African ancestry ( $n = 7022$ ), whereas the power is 65.72% for the SUNLIGHT (discovery plus replication samples) and 4.55% for the SUNLIGHT discovery sample ( $n = 14,020$ ).

The African American-specific GWAS meta-analysis uncovered a genomewide significant association with a low-frequency SNP, rs79666294, near *KIF4B* (Table 2), although its signal is slightly below the genomewide threshold in the transeethnic meta-analysis ( $P = 1.2 \times 10^{-6}$ ,  $n = 4737$ ). This variant was not significantly associated with 25(OH)D concentrations in the Hispanic ancestry cohort ( $n = 738$ ;  $P = 0.61$ ; MAF = 0.03) and not genotyped or imputed in SUNLIGHT (MAF in the European 1000 Genomes population is 0.03), so the results appear to be driven by the African American cohorts (MAF = 0.01). Although the closest gene to SNP rs79666294 is *KIF4B*, this SNP is an expression quantitative trait locus for another nearby gene, *FAXDC2* [Genotype-Tissue Expression (GTEx) Portal accessed on 22 November 2017; GTEx Analysis Release V7, dbGaP Accession phs000424.v7.p2]. *FAXDC2* codes for the fatty acid hydroxylase domain-containing protein 2, which is involved in cholesterol and steroid biosynthesis. Given that cholesterol (7-dehydrocholesterol) is a precursor to vitamin D (previtamin D<sub>3</sub>) produced in the skin, this finding could have meaningful biologic implications. According to the GTEx Project, the highest expression of

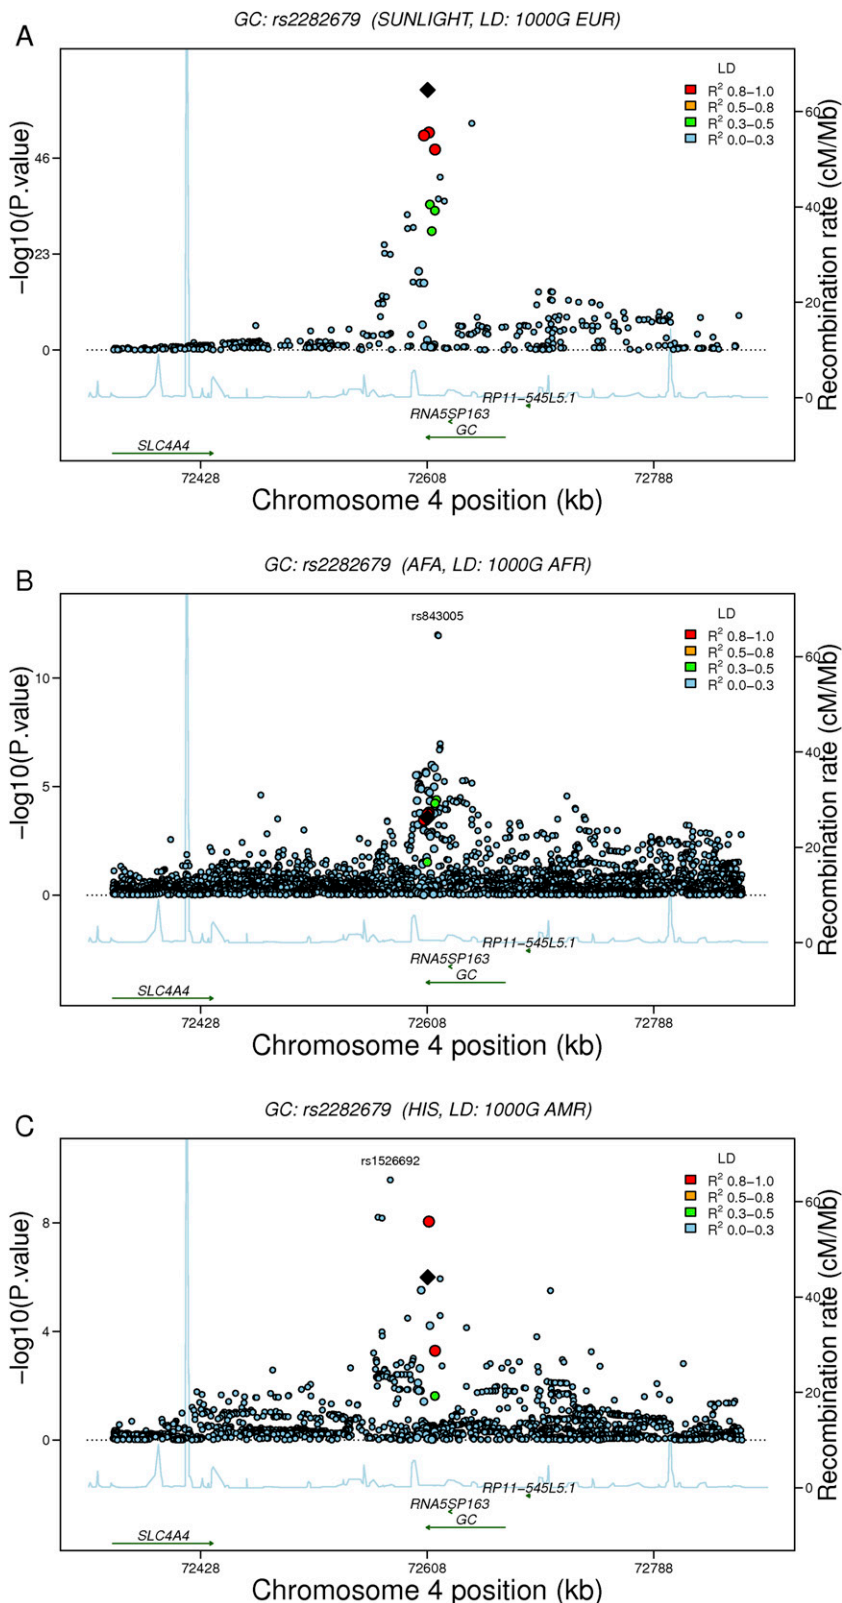

**Figure 1.** Regional association plots for GC SNPs on chromosome 4 for European (EUR), African (AFR), and Hispanic (AMR) ancestries. Log<sub>10</sub> *P* values of genotyped SNPs are plotted against their position in the genome (build 37). The top SNP from the transesthetic analysis is shown with the black diamond, and shading of the circles corresponds to the LD with the top transesthetic SNP (measured with *r*<sup>2</sup> and relevant populations from 1000G phase I data). Because of the highly significant *P* values, the SUNLIGHT regional association plot is on a different scale than the African and Hispanic plots are.

*FAXDC2* is in pituitary tissue. This finding warrants replication in a larger African ancestry cohort, when available.

Transesthetic evaluation led to the identification of a low-frequency SNP, rs1410656, near the *HTR2A* gene. *HTR2A* encodes a serotonin receptor. Mutations in this gene affect serotonin levels, which are associated with mental health, such as schizophrenia, obsessive-compulsive disorder, and major depressive disorder (27). Additionally, vitamin D supplementation has been shown to reduce depressive symptoms and decrease the risk of schizophrenia (28, 29). However, the mechanism by which *HTR2A* functions warrants further inquiry. Additionally, the transesthetic evaluation led to a second discovery, rs719700 (MAF = 0.04), on chromosome 12, which is downstream of *ANO6* and upstream of *ARID2* (Supplemental Fig. 2); this SNP was found to be associated with 25(OH)D in the African American and SUNLIGHT cohorts as well but was monomorphic in the Hispanic American cohort (Table 3). Although rs719700 is the top variant in this region in the transesthetic analysis and in SUNLIGHT, the most statistically significant SNP in this region for African Americans is rs114330994. SNPs rs719700 and rs114330994 are not in LD, suggesting that the LD structure around a putative underlying functional variant is different between African and European ancestry. *ANO6* activates a multipass transmembrane protein that is involved in calcium transport primarily in the bones (30, 31). Scott syndrome is a rare congenital bleeding disorder caused by a mutation of this gene. There are no studies available examining 25(OH)D concentrations in this syndrome. However, *ANO6* has been shown to have differential expression in peripheral blood cells between the first and third trimester in pregnancy that is modified by underlying vitamin D concentrations (32). *ARID2* is a member of the adenine- and thymine-rich



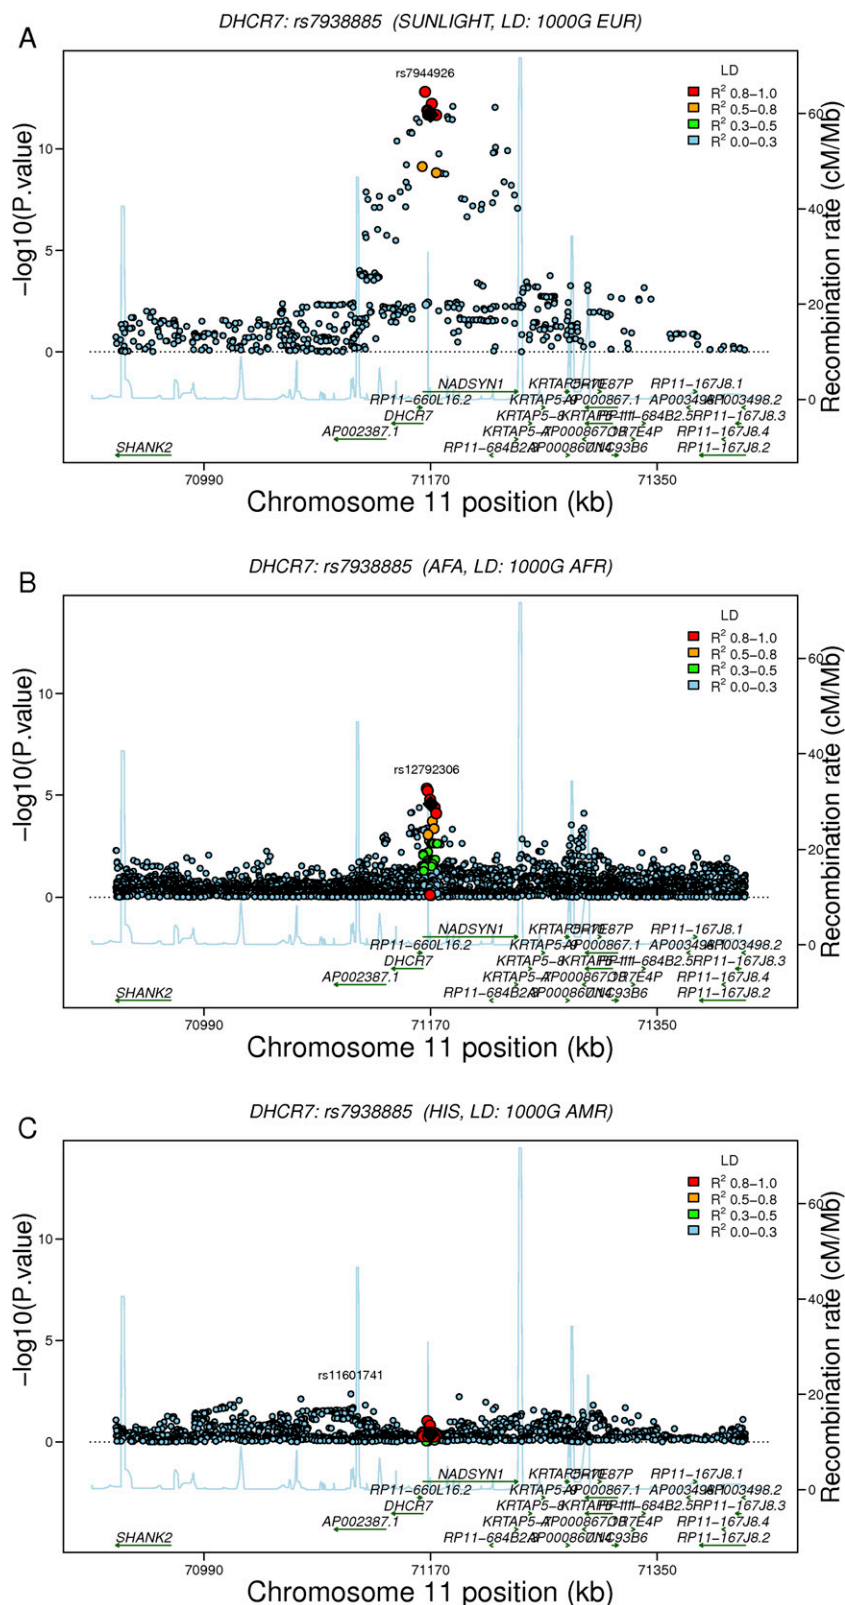

**Figure 2.** Regional association plots for *DHCR7* SNPs on chromosome 11 for European (EUR), African (AFR), and Hispanic (AMR) ancestries. Log<sub>10</sub> *P* values of genotyped SNPs are plotted against their position in the genome (build 37). The top SNP from the transethnic analysis is shown with the black diamond, and shading of the circles corresponds to the LD with the top transethnic SNP (measured with *r*<sup>2</sup> and relevant populations from 1000G phase I data).

interactive domain-containing family of DNA-binding proteins that is a subunit of a protein involved in ligand-dependent transcriptional activation by nuclear receptors. Mutations in this gene are associated with hepatocellular carcinomas (30, 31, 33). The relationship between this gene region and 25 (OH)D concentrations is unclear.

Loci *HTR2A*, *ANO6/ARID2*, and *KIF4B* were not associated with 25(OH)D concentrations in the SUNLIGHT European ancestry analysis. SNP rs79666294 (*KIF4B*) was not genotyped, and no other SNPs in the region were significant in SUNLIGHT. SNPs rs1410656 (*HTR2A*) and rs719700 (*ANO6/ARID2*) were not identified in the European ancestry analysis because it was not selected for replication in SUNLIGHT because it did not meet the study’s criteria for replication (1).

There are limitations to our study. Although the sample sizes are the largest to date, they are small, especially for the Hispanic American cohort (N = 3485). Of note, our Hispanic cohorts come from Mexican and Puerto Rican backgrounds, and this heterogeneity in the Hispanic samples could have limited our ability to detect associations. Additionally, not all cohorts included in the analyses used the same assay for 25(OH)D measurement. We accounted for this limitation by combining test statistics in the form of *z* scores rather than performing a fixed-effect meta-analysis of the effect estimates. Finally, the imputation used may not have been dense enough to capture the functional SNP or in some cases (*i.e.*, *CYP2R1* and *CPY24A1*) the SNPs in LD with the functional SNP.

**Conclusion**

Investigators from the TRANSCEN-D consortium performed the largest multiethnic GWAS for genetic determinants of 25(OH)D concentrations to date. TRANSCEN-D consists of data from 12 cohorts of African and

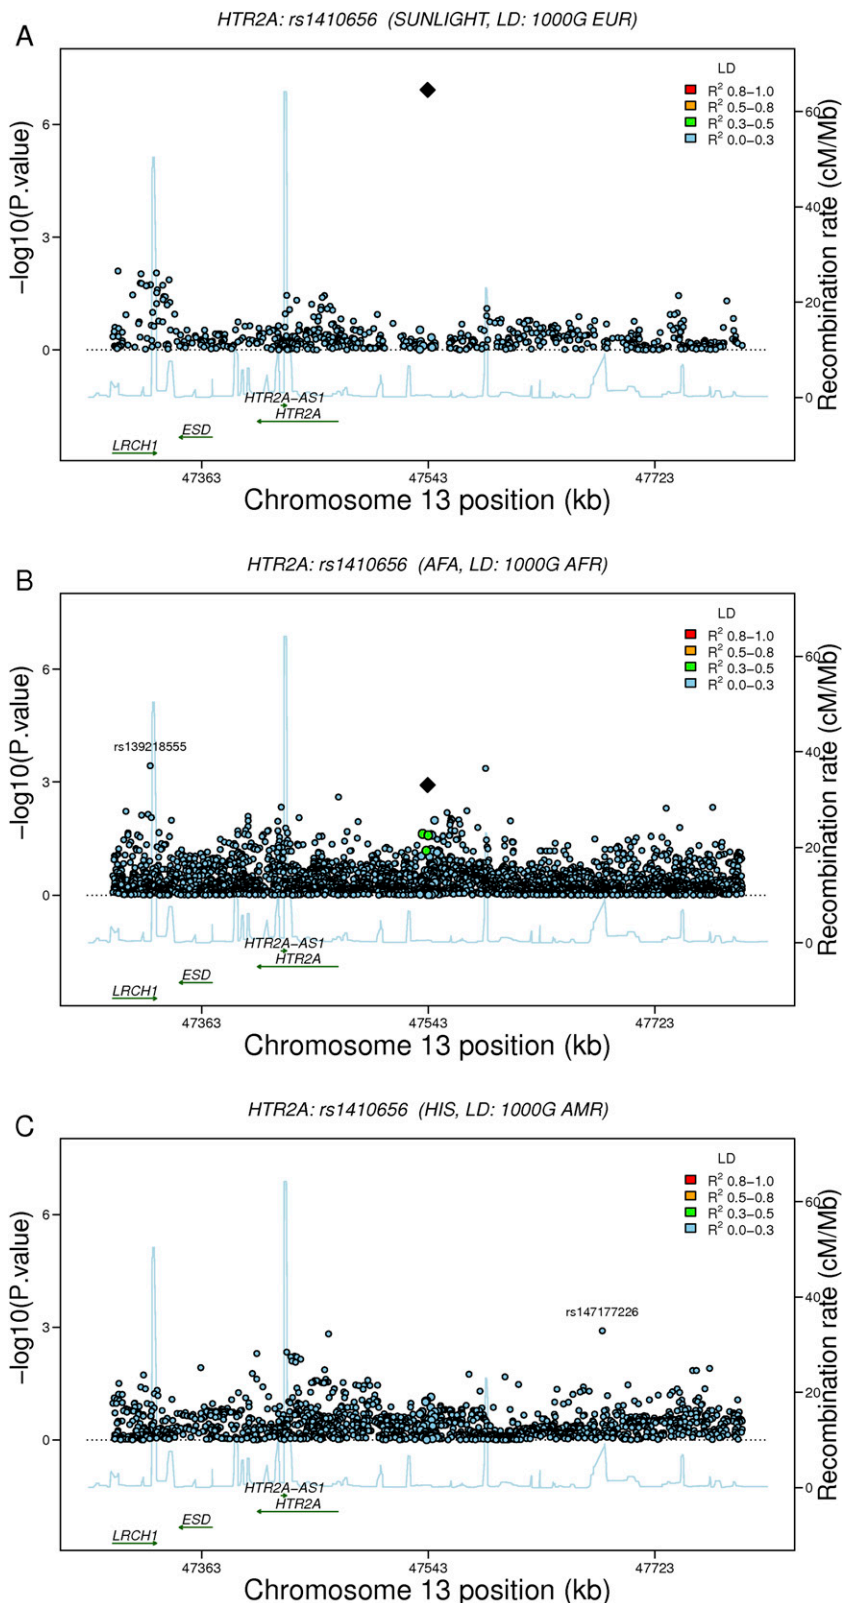

**Figure 3.** Regional association plots for *HTR2A* SNPs on chromosome 13 for European (EUR), African (AFR), and Hispanic (AMR) ancestries. Log<sub>10</sub> *P* values of genotyped SNPs are plotted against their position in the genome (build 37). The top SNP from the transesthetic analysis is shown with the black diamond (this SNP was not genotyped for the Hispanic ancestry, so no black diamond is displayed), and shading of the circles corresponds to the LD with the top transesthetic SNP (measured with  $r^2$  and relevant populations from 1000G phase I data). The LD information is sparse in this regional association plot because of the low minor allele frequency of *HTR2A*.

Hispanic ancestry. By using the  $z$  score approach, the transesthetic evaluation replicated previous associations between both *GC* and *DHCR7* and 25(OH)D. The evaluation of individual non-European cohorts and the transesthetic meta-analysis identified SNPs near *ANO6/ARID2* and *HTR2A* and an SNP near *KIF4B* for African ancestry. Additional inquiry into the biological relationship between 25(OH)D and these regions is warranted.

## Acknowledgments

**Financial Support:** J.H., J. Dupuis, J.M., and C.-T.L. were supported by National Institutes of Health (NIH) grant R01 DK078616. K.E.H. was supported by a National Library of Medicine training grant to the Computation and Informatics in Biology and Medicine Training Program (NLM 5T15LM007359). L.K.B. was supported by National Research Service Award Institutional Training Grant T32 DK007028-35 to Massachusetts General Hospital, the Endocrine Society's Lilly Scholar's Award, an NIH Loan Repayment Award, and the NorthShore University HealthSystem Auxiliary Research Scholar Award. M.A.N.'s participation is supported by a consulting contract between Data Tecnica International and the National Institute on Aging (NIA), NIH, Bethesda, MD.

Research reported in this publication was supported by the National Heart, Lung, and Blood Institute (NHLBI) of the NIH under award number R56HL124004 to C.D.E. The content is solely the responsibility of the authors and does not necessarily represent the official views of the National Institutes of Health.

## AADHS

The AADHS was supported by NIH grants R01-DK-071891 from the National Institute of Diabetes and Digestive and Kidney Diseases and General Clinical Research Center of Wake Forest School of Medicine grant M01-RR-07122.

## ARIC

ARIC's contribution to this project was supported by NHLBI R01 HL103706 and contracts (HHSN268201100005C,

HHSN268201100006C, HHSN268201100007C, HHSN268201100008C, HHSN268201100009C, HHSN268201100010C, HHSN268201100011C, and HHSN268201100012C), R01HL087641, R01HL59367, and R01HL086694; Office of Dietary Supplements grant number R01 HL103706-S1; National Human Genome Research Institute contract U01HG004402; and NIH contract HHSN268200625226C. Infrastructure was partly supported by grant number UL1RR025005, a component of the NIH and NIH Roadmap for Medical Research.

The authors thank the staff and participants of the ARIC study for their important contributions.

### Asian Indian Diabetic Heart Study/Sikh Diabetes Study

This work was supported by NIH grants R01DK082766, funded by the National Institute of Diabetes and Digestive and Kidney Diseases, and NOT-HG-11-009, funded by the National Human Genome Research Institute. This work was also partly supported by VPR Bridge Grant and Harold Hamm Enrichment Grant from the University of Oklahoma Health Sciences Center. The authors thank all the participants of the Asian Indian Diabetic Heart Study/Sikh Diabetes Study and are grateful for their contribution to this study.

### BMDCS

This work was supported by the NIH (grant numbers HD58886 and HD076321); the Eunice Kennedy Shriver National Institute of Child Health and Human Development contracts N01-HD-1-3228, N01-HD-1-3329, N01-HD-1-3330, N01-HD-1-3331, N01-HD-1-3332, and N01-HD-1-3333; and the NIH Clinical and Translational Science Award program (grant 8 UL1 TR000077).

### BPRHS

NIH grants P01 AG023394 and P50 HL105185.

### CHOP

This research was financially supported by an Institute Development Award from CHOP, a Research Development Award from the Cotswold Foundation, and NIH grant R01 HD056465.

The authors thank the network of primary care clinicians and the patients and families for their contribution to this project and to clinical research facilitated by the Pediatric Research Consortium at CHOP. R. Chiavacci, E. Dabaghyan, A. (Hope) Thomas, K. Harden, A. Hill, C. Johnson-Honesty, C. Drummond, S. Harrison, F. Salley, C. Gibbons, K. Lilliston, C. Kim, E. Frackelton, F. Mentch, G. Otieno, K. Thomas, C. Hou, K. Thomas, and M.L. Garris provided expert assistance with genotyping or data collection and management. The authors also thank S. Kristinsson, L.A. Hermannsson, and A. Krisbjörnsson of Raförninn ehf for extensive software design and contributions.

### CHS

This CHS research was supported by NHLBI contracts HHSN268200800007C and HHSN268201200036C,

N01HC55222, N01HC85079, N01HC85080, N01HC85081, N01HC85082, N01HC85083, and N01HC85086; and NHLBI grants U01HL080295, R01HL085251, R01HL087652, R01HL105756, R01HL103612, R01HL120393, and R01HL130114, with additional contribution from the National Institute of Neurologic Disorders and Stroke. Additional support was provided through R01AG023629 from the NIA. A full list of principal CHS investigators and institutions can be found at CHS-NHLBI.org. The provision of genotyping data was supported in part by the National Center for Advancing Translational Sciences, Clinical & Translational Science Institute grant UL1TR000124, and the National Institute of Diabetes and Digestive and Kidney Disease Diabetes Research Center grant DK063491 to the Southern California Diabetes Endocrinology Research Center. The content is solely the responsibility of the authors and does not necessarily represent the official views of the NIH.

### Health ABC

This research was supported by the Intramural Research Program of the NIA, contracts N01AG62101, N01AG62103, and N01AG62106; and NIA grant R01 AG028050; and National Institute of Nursing Research grant R01 NR012459. Assessment of 25-hydroxyvitamin D was funded by NIA grant R01 AG029364. The GWAS was funded by NIA grant R01 AG032098 to Wake Forest University Health Sciences, and genotyping services were provided by the Center for Inherited Disease Research. The Center for Inherited Disease Research is fully funded through a federal contract from the NIH to The Johns Hopkins University, contract number HHSN268200782096C.

### IRASFS

The IRASFS was supported by HL-060944, HL-061019, and HL-060919. The provision of genotyping was supported by DK085175 (GUARDIAN) and in part by UL1-TR-000124 (Clinical & Translational Science Institute) and DK063491 (Diabetes Research Center). Vitamin D measurement in the IRASFS was supported by American Diabetes Association award 25-15105.

### JHS

The JHS is supported by contracts HSN268201300046C, HSN268201300047C, HHSN268201300048C, HHSN268201300049C, and HHSN268201300050C from the National Institute on Minority Health and Health Disparities.

We thank the JHS team (University of Mississippi Medical Center, Jackson State University, and Tougaloo College) and participants for their long-term commitment that continues to improve our understanding of the genetic epidemiology of cardiovascular and other chronic diseases.

### MESA

MESA and the MESA SNP Health Association Resource (SHARe) project are conducted and supported by the NHLBI in collaboration with MESA investigators. Support for MESA is provided by contracts HHSN268201500003I, N01-HC-95159,

N01-HC-95160, N01-HC-95161, N01-HC-95162, N01-HC-95163, N01-HC-95164, N01-HC-95165, N01-HC-95166, N01-HC-95167, N01-HC-95168, and N01-HC-95169; UL1-TR-000040, UL1-TR-001079, and UL1-TR-001420; UL1-TR-001881; and DK063491. Funding for SHARe genotyping was provided by NHLBI contract N02-HL-64278. Genotyping was performed at Affymetrix (Santa Clara, California) and the Broad Institute of Harvard and MIT (Boston, Massachusetts) with the Affymetrix Genome-Wide Human SNP Array 6.0. Support for the Mineral Metabolite data set was provided by grant HL096875.

### Mt. Sinai SM BioMe Biobank

The Mount Sinai IPM Biobank Program is supported by The Andrea and Charles Bronfman Philanthropies.

**Correspondence and Reprint Requests:** Liana K. Billings, MD, 2650 Ridge Avenue, Suite 230 Burch, Evanston, Illinois 60201. E-mail: [lbillings@northshore.org](mailto:lbillings@northshore.org).

**Disclosure Summary:** M.A.N. consults for Illumina Inc., the Michael J. Fox Foundation, and University of California Healthcare, among others. B.M.P. serves on the data and safety monitoring board of a clinical trial funded by Zoll LifeCor and on the steering committee of the Yale Open Data Access Project, funded by Johnson & Johnson. L.K.B. is a paid consultant and speaker for Novo Nordisk, Inc. The remaining authors have nothing to disclose.

### References

- Wang TJ, Zhang F, Richards JB, Kestenbaum B, van Meurs JB, Berry D, Kiel DP, Streeten EA, Ohlsson C, Koller DL, Peltonen L, Cooper JD, O'Reilly PF, Houston DK, Glazer NL, Vandenput L, Peacock M, Shi J, Rivadeneira F, McCarthy MI, Anneli P, de Boer IH, Mangino M, Kato B, Smyth DJ, Booth SL, Jacques PF, Burke GL, Goodarzi M, Cheung CL, Wolf M, Rice K, Goltzman D, Hidiroglou N, Ladouceur M, Wareham NJ, Hocking LJ, Hart D, Arden NK, Cooper C, Malik S, Fraser WD, Hartikainen AL, Zhai G, Macdonald HM, Frouhi NG, Loos RJ, Reid DM, Hakim A, Dennison E, Liu Y, Power C, Stevens HE, Jaana L, Vasani RS, Soranzo N, Bojunga J, Psaty BM, Lorentzon M, Foroufard T, Harris TB, Hofman A, Jansson JO, Cauley JA, Uitterlinden AG, Gibson Q, Jarvelin MR, Karasik D, Siscovick DS, Econs MJ, Kritchevsky SB, Florez JC, Todd JA, Dupuis J, Hyppönen E, Spector TD. Common genetic determinants of vitamin D insufficiency: a genome-wide association study. *Lancet*. 2010;376(9736):180–188.
- Forrest KYZ, Stuhldreher WL. Prevalence and correlates of vitamin D deficiency in US adults. *Nutr Res*. 2011;31(1):48–54.
- Institute of Medicine. *Dietary Reference Intakes for Calcium and Vitamin D*. Washington, DC: The National Academies Press; 2011.
- Holick MF. High prevalence of vitamin D inadequacy and implications for health. *Mayo Clin Proc*. 2006;81(3):353–373.
- Holick MF. Vitamin D deficiency. *N Engl J Med*. 2007;357(3):266–281.
- Robinson-Cohen C, Hoofnagle AN, Ix JH, Sachs MC, Tracy RP, Siscovick DS, Kestenbaum BR, de Boer IH. Racial differences in the association of serum 25-hydroxyvitamin D concentration with coronary heart disease events. *JAMA*. 2013;310(2):179–188.
- Kunutsor SK, Burgess S, Munroe PB, Khan H. Vitamin D and high blood pressure: causal association or epiphenomenon? *Eur J Epidemiol*. 2014;29(1):1–14.
- Afzal S, Brøndum-Jacobsen P, Bojesen SE, Nordestgaard BG. Genetically low vitamin D concentrations and increased mortality: Mendelian randomisation analysis in three large cohorts. *BMJ*. 2014;349:g6330.
- Mokry LE, Ross S, Ahmad OS, Forgetta V, Smith GD, Goltzman D, Leong A, Greenwood CM, Thanassoulis G, Richards JB. Vitamin D and risk of multiple sclerosis: a Mendelian randomization study [published correction appears in *PLoS Med*. 2016;13(3):e1001981]. *PLoS Med*. 2015;12(8):e1001866.
- Ong J-S, Cuellar-Partida G, Lu Y, Fasching PA, Hein A, Burghaus S, Beckmann MW, Lambrechts D, Van Nieuwenhuysen E, Vergote I, Vanderstichele A, Anne Doherty J, Anne Rossing M, Chang-Claude J, Eilber U, Rudolph A, Wang-Gohrke S, Goodman MT, Bogdanova N, Dörk T, Dürst M, Hillemanns P, Runnebaum IB, Antonenkova N, Butzow R, Leminen A, Nevanlinna H, Pelttari LM, Edwards RP, Kelley JL, Modugno F, Moysich KB, Ness RB, Cannioto R, Høgdall E, Høgdall CK, Jensen A, Giles GG, Bruinsma F, Kjaer SK, Hildebrandt MA, Liang D, Lu KH, Wu X, Bisogna M, Dao F, Levine DA, Cramer DW, Terry KL, Tworoger SS, Stampfer M, Missmer S, Bjorge L, Salvesen HB, Kopperud RK, Bischof K, Aben KK, Kiemeny LA, Massuger LF, Brooks-Wilson A, Olson SH, McGuire V, Rothstein JH, Sieh W, Whittemore AS, Cook LS, Le ND, Gilks CB, Gronwald J, Jakubowska A, Lubiński J, Kluz T, Song H, Tyrer JP, Wentzensen N, Brinton L, Trabert B, Lissowska J, McLaughlin JR, Narod SA, Phelan C, Anton-Culver H, Zogas A, Eccles D, Campbell I, Gayther SA, Gentry-Maharaj A, Menon U, Ramus SJ, Wu AH, Dansonka-Mieszkowska A, Kupryjanczyk J, Timorek A, Szafron L, Cunningham JM, Fridley BL, Winham SJ, Bandera EV, Poole EM, Morgan TK, Risch HA, Goode EL, Schildkruit JM, Pearce CL, Berchuck A, Pharoah PD, Chenevix-Trench G, Gharahkhani P, Neale RE, Webb PM, MacGregor S; Australian Ovarian Cancer Study. Association of vitamin D levels and risk of ovarian cancer: a Mendelian randomization study. *Int J Epidemiol*. 2016;45(5):1619–1630.
- Vimaleswaran KS, Cavadino A, Berry DJ, Jorde R, Dieffenbach AK, Lu C, Alves AC, Heerspink HJ, Tikkanen E, Eriksson J, Wong A, Mangino M, Jablonski KA, Nolte IM, Houston DK, Ahluwalia TS, van der Most PJ, Pasko D, Zgaga L, Thiering E, Vitart V, Fraser RM, Huffman JE, de Boer RA, Schöttker B, Saum KU, McCarthy MI, Dupuis J, Herzig KH, Sebert S, Pouta A, Laitinen J, Kleber ME, Navis G, Lorentzon M, Jameson K, Arden N, Cooper JA, Acharya J, Hardy R, Raitakari O, Ripatti S, Billings LK, Lahti J, Osmond C, Penninx BW, Rejnmark L, Lohman KK, Paternoster L, Stolk RP, Hernandez DG, Byberg L, Hagström E, Melhus H, Ingelsson E, Mellström D, Ljunggren O, Tzoulaki I, McLachlan S, Theodoratou E, Tiesler CM, Julia A, Navarro P, Wright AF, Polasek O, Wilson JF, Rudan I, Salomaa V, Heinrich J, Campbell H, Price JF, Karlsson M, Lind L, Michaëlsson K, Bandinelli S, Frayling TM, Hartman CA, Sørensen TI, Kritchevsky SB, Langdahl BL, Eriksson JG, Florez JC, Spector TD, Lehtimäki T, Kuh D, Humphries SE, Cooper C, Ohlsson C, März W, de Borst MH, Kumari M, Kivimäki M, Wang TJ, Power C, Brenner H, Grimmer G, van der Harst P, Snieder H, Hingorani AD, Pilz S, Whittaker JC, Jarvelin MR, Hyppönen E; LifeLines Cohort Study investigators; International Consortium for Blood Pressure (ICBP); Cohorts for Heart and Aging Research in Genomic Epidemiology (CHARGE) consortium; Global Blood Pressure Genetics (Global BPGen) consortium; Caroline Hayward. Association of vitamin D status with arterial blood pressure and hypertension risk: a mendelian randomisation study. *Lancet Diabetes Endocrinol*. 2014;2(9):719–729.
- Kueider AM, Tanaka T, An Y, Kitner-Triolo MH, Palchamy E, Ferrucci L, Thambisetty M. State- and trait-dependent associations of vitamin-D with brain function during aging. *Neurobiol Aging*. 2016;39:38–45.
- Weaver CM, Alexander DD, Boushey CJ, Dawson-Hughes B, Lappe JM, LeBoff MS, Liu S, Looker AC, Wallace TC, Wang DD. Calcium plus vitamin D supplementation and risk of fractures: an updated meta-analysis from the National Osteoporosis Foundation [published correction appears in *Osteoporos Int*. 2016;27(8):2643–2646]. *Osteoporos Int*. 2016;27(1):367–376.
- Bischoff-Ferrari HA, Willett WC, Wong JB, Giovannucci E, Dietrich T, Dawson-Hughes B. Fracture prevention with vitamin D

- supplementation: a meta-analysis of randomized controlled trials. *JAMA*. 2005;293(18):2257–2264.
15. Boonen S, Lips P, Bouillon R, Bischoff-Ferrari HA, Vanderschueren D, Haentjens P. Need for additional calcium to reduce the risk of hip fracture with vitamin d supplementation: evidence from a comparative metaanalysis of randomized controlled trials. *J Clin Endocrinol Metab*. 2007;92(4):1415–1423.
  16. Grant WB, Peiris AN. Possible role of serum 25-hydroxyvitamin D in black-white health disparities in the United States. *J Am Med Dir Assoc*. 2010;11(9):617–628.
  17. Fiscella K, Winters P, Tancredi D, Franks P. Racial disparity in blood pressure: is vitamin D a factor? *J Gen Intern Med*. 2011;26(10):1105–1111.
  18. Fiscella K, Winters P, Tancredi D, Hendren S, Franks P. Racial disparity in death from colorectal cancer: does vitamin D deficiency contribute? *Cancer*. 2011;117(5):1061–1069.
  19. Reis JP, Michos ED, von Mühlen D, Miller ER III. Differences in vitamin D status as a possible contributor to the racial disparity in peripheral arterial disease. *Am J Clin Nutr*. 2008;88(6):1469–1477.
  20. Ahn J, Yu K, Stolzenberg-Solomon R, Simon KC, McCullough ML, Gallicchio L, Jacobs EJ, Ascherio A, Helzlsouer K, Jacobs KB, Li Q, Weinstein SJ, Purdue M, Virtamo J, Horst R, Wheeler W, Chanock S, Hunter DJ, Hayes RB, Kraft P, Albanes D. Genome-wide association study of circulating vitamin D levels. *Hum Mol Genet*. 2010;19(13):2739–2745.
  21. Engelman CD, Fingerlin TE, Langefeld CD, Hicks PJ, Rich SS, Wagenknecht LE, Bowden DW, Norris JM. Genetic and environmental determinants of 25-hydroxyvitamin D and 1,25-dihydroxyvitamin D levels in Hispanic and African Americans. *J Clin Endocrinol Metab*. 2008;93(9):3381–3388.
  22. Engelman CD, Meyers KJ, Ziegler JT, Taylor KD, Palmer ND, Haffner SM, Fingerlin TE, Wagenknecht LE, Rotter JJ, Bowden DW, Langefeld CD, Norris JM. Genome-wide association study of vitamin D concentrations in Hispanic Americans: the IRAS family study. *J Steroid Biochem Mol Biol*. 2010;122(4):186–192.
  23. McCarthy MI, Abecasis GR, Cardon LR, Goldstein DB, Little J, Ioannidis JP, Hirschhorn JN. Genome-wide association studies for complex traits: consensus, uncertainty and challenges. *Nat Rev Genet*. 2008;9(5):356–369.
  24. National Weather Service Climate Prediction Center. UV index: monthly means and maximums. Available at: [http://www.cpc.ncep.noaa.gov/products/stratosphere/uv\\_index/uv\\_meanmax.shtml](http://www.cpc.ncep.noaa.gov/products/stratosphere/uv_index/uv_meanmax.shtml).
  25. Willer CJ, Li Y, Abecasis GR. METAL: fast and efficient meta-analysis of genomewide association scans. *Bioinformatics*. 2010;26(17):2190–2191.
  26. Chatterjee N, Shi J, García-Closas M. Developing and evaluating polygenic risk prediction models for stratified disease prevention. *Nat Rev Genet*. 2016;17(7):392–406.
  27. Gene ID: 3356. HTR2A 5-hydroxytryptamine receptor 2A [*Homo sapiens* (human)]. Available at: <https://www.ncbi.nlm.nih.gov/gene?Db=gene&Cmd=DetailsSearch&Term=3356>. Accessed 1 August 2017.
  28. Penckofer S, Kouba J, Byrn M, Estwing Ferrans C. Vitamin D and depression: where is all the sunshine? *Issues Ment Health Nurs*. 2010;31(6):385–393.
  29. Parker GB, Brotchie H, Graham RK. Vitamin D and depression. *J Affect Disord*. 2017;208:56–61.
  30. Gene ID: 196527. ANO6 anoctamin 6 [*Homo sapiens* (human)]. Available at: <https://www.ncbi.nlm.nih.gov/gene?Db=gene&Cmd=DetailsSearch&Term=196527>. Accessed 27 January 2017.
  31. Ousingawat J, Wanitchakool P, Schreiber R, Wuelling M, Vortkamp A, Kunzelmann K. Anoctamin-6 controls bone mineralization by activating the calcium transporter NCX1. *J Biol Chem*. 2015;290(10):6270–6280.
  32. Al-Garawi A, Carey VJ, Chhabra D, Mirzakhani H, Morrow J, Lasky-Su J, Qiu W, Laranjo N, Litonjua AA, Weiss ST. The role of vitamin D in the transcriptional program of human pregnancy. *PLoS One*. 2016;11(10):e0163832.
  33. Gene ID: 196528. ARID2 AT-rich interaction domain 2 [*Homo sapiens* (human)]. Available at: <https://www.ncbi.nlm.nih.gov/gene?Db=gene&Cmd=DetailsSearch&Term=196528>. Accessed 31 March 2017.
